# Supplementary material
Source: PubMed Central journal article supplement (PMC4019600)
Supplement: NIHMS577466-supplement-01.pdf [file NIHMS577466-supplement-01.pdf]

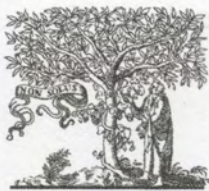

ELSEVIER

***Chemico-Biological Interactions***  
**Conflict of Interest Policy**

Manuscript number (if applicable): S13-000727  
Article Title: Chloride and other anions inhibit  
dichloroacetate-induced inactivation of human liver  
GSTZ1 in a haplotype-dependent manner

Author name: Guo Zhong

**Declarations**

*Chemico-Biological Interactions* requires that all authors sign a declaration of conflicting interests. If you have nothing to declare in any of these categories then this should be stated.

**Conflict of Interest**

A conflicting interest exists when professional judgement concerning a primary interest (such as patient's welfare or the validity of research) may be influenced by a secondary interest (such as financial gain or personal rivalry). It may arise for the authors when they have financial interest that may influence their interpretation of their results or those of others. Examples of potential conflicts of interest include employment, consultancies, stock ownership, honoraria, paid expert testimony, patent applications/registrations, and grants or other funding.

**Please state any competing interests**

There are no competing interests

**Funding Source**

All sources of funding should also be acknowledged and you should declare any involvement of study sponsors in the study design; collection, analysis and interpretation of data; the writing of the manuscript; the decision to submit the manuscript for publication. If the study sponsors had no such involvement, this should be stated.

**Please state any sources of funding for your research**

Funding was provided in part from the US Public Health Service, grant number GM099871

**Signature** (a scanned signature is acceptable, but each author must sign)

*Guo Zhong*  
12/10/13

**Print name**

Guo Zhong
